# Supplementary material for: Development and Characterization of a Multiplex Assay to Quantify Complement-Fixing Antibodies against Dengue Virus
Source: Int J Mol Sci. 2021 Nov 5;22(21):12004. doi: 10.3390/ijms222112004 (PMC8584793; doi:10.3390/ijms222112004)
Supplement: Supplementary file 1 [file ijms-22-12004-s001.zip › Nascimento et al_All Data_CFA_MNT50_Total Binding_Supplemental Material.xlsx]

## Sheet: Sheet1
Study	Visit	SubjectID	Age	BL_MNT_Serostatus	Complement-Fixing Antibodies DENV1 VLP Titer (EU/mL)	DENV1 MNT	Total binding DENV1 (RU/mL)	Complement-Fixing Antibodies DENV2 VLP Titer (EU/mL)	DENV2 MNT	Total binding DENV2 (RU/mL)	Complement-Fixing Antibodies DENV3 VLP Titer (EU/mL)	DENV3 MNT	Total binding DENV3 (RU/mL)	Complement-Fixing Antibodies DENV4VLP Titer (EU/mL)	DENV4 MNT	Total binding DENV4 (RU/mL)
DEN-203	0	1022003	12	Seronegative	2	5	ND	2	5	ND	2	5	ND	2	5	ND
DEN-203	0	1022004	13	Seronegative	2	5	ND	2	5	ND	2	5	ND	2	5	ND
DEN-203	0	1022005	14	Seronegative	2	5	190.878	2	5	169.352	2	5	186.112	2	5	203.154
DEN-203	0	1022006	12	Seronegative	2	5	96.8965	2	5	48.3244	2	5	62.0514	2	5	41.1936
DEN-203	0	1023008	10	Seronegative	2	5	776.149	2	5	897.437	2	5	621.514	2	5	625.453
DEN-203	0	1023010	9	Seronegative	2	5	87.299	2	5	36.4154	2	5	44.049	2	5	56.9765
DEN-203	0	1031009	23	Seronegative	2	5	124.858	2	5	108.213	2	5	101.624	2	5	109.136
DEN-203	0	1031010	21	Seronegative	2	5	385.462	2	5	302.245	2	5	259.97	2	5	202.225
DEN-203	0	1032004	12	Seronegative	2	5	391.873	2	5	264.901	2	5	408.089	2	5	341.28
DEN-203	0	1032008	16	Seronegative	2	5	197.411	2	5	169.948	2	5	268.967	2	5	260.026
DEN-203	0	1044001	3	Seronegative	2	5	103.204	2	5	60.1528	2	5	92.4541	2	5	37.039
DEN-203	0	1044003	4	Seronegative	2	5	90.8372	2	5	60.2825	2	5	197.067	2	5	130.661
DEN-203	0	1044010	3	Seronegative	2	5	809.631	2	5	899.243	2	5	898.775	2	5	815.615
DEN-203	0	1052013	14	Seropositive	10	40	533.99	16	1280	882.138	7	10	488.855	4	5	287.963
DEN-203	0	1052014	19	Seropositive	21	10240	3075.32	7	640	743.953	15	640	1315.36	6	640	863.904
DEN-203	0	1053003	9	Seronegative	2	5	333.483	2	5	346.074	2	5	306.989	2	5	322.405
DEN-203	0	1053004	6	Seronegative	2	5	415.811	2	5	370.248	2	5	337.137	2	5	346.069
DEN-203	0	1053005	7	Seronegative	2	5	194.654	2	5	210.321	2	5	301.049	2	5	264.113
DEN-203	0	1053007	9	Seropositive	15	40	1608	16	640	1861.22	7	80	1133.02	5	5	915.581
DEN-203	0	1053009	10	Seropositive	2	10	406.026	2	5	230.56	2	5	321.977	2	5	211.229
DEN-203	0	1053011	8	Seropositive	4	40	487.569	3	5	334.765	3	20	335.954	12	320	642.301
DEN-203	0	1053012	7	Seronegative	2	5	76.6795	2	5	54.7559	2	5	88.6878	2	5	95.0318
DEN-203	0	1054003	4	Seropositive	2	40	283.739	2	5	246.01	2	10	213.944	2	5	246.468
DEN-203	0	1054005	3	Seronegative	2	5	199.476	2	5	121.686	2	5	169.577	2	5	172.582
DEN-203	0	1054006	3	Seronegative	2	5	ND	2	5	ND	2	5	ND	2	5	ND
DEN-203	0	1063001	9	Seronegative	2	5	180.261	2	5	122.591	2	5	235.311	2	5	202.606
DEN-203	0	1071001	28	Seropositive	15	160	2190.56	30	5120	2663.76	12	160	1478.76	8	40	1306.24
DEN-203	0	1071005	34	Seropositive	1915	1280	28777	1565	10240	32811.7	1564	5120	23419.7	730	640	10863.2
DEN-203	0	1071023	21	Seronegative	2	5	ND	2	5	ND	2	5	ND	2	5	ND
DEN-203	0	1072002	18	Seronegative	2	5	ND	2	5	ND	2	5	ND	2	5	ND
DEN-203	0	1081003	27	Seronegative	2	5	ND	2	5	ND	2	5	ND	2	5	ND
DEN-203	0	1081007	31	Seronegative	2	5	3.59757	2	5	31.433	2	5	0.255611	2	5	0.261177
DEN-203	0	1082011	16	Seropositive	23	160	2386.74	13	80	1425.64	44	320	3175.51	10	40	1249.84
DEN-203	0	1083005	10	Seropositive	356	20480	9982.06	107	160	3231.21	191	1280	9192.01	46	40	1000.73
DEN-203	0	1084002	3	Seronegative	2	5	59.0959	2	5	16.0114	2	5	21.0506	2	5	11.0302
DEN-203	0	1084008	1.5	Seronegative	2	5	ND	2	5	ND	2	5	ND	2	5	ND
DEN-203	0	1093001	10	Seronegative	2	5	354.081	2	5	263.153	2	5	318.646	2	5	319.271
DEN-204	0	2080012	3	Seronegative	2	5	106.422	2	5	47.8749	2	5	65.4643	2	5	84.2868
DEN-204	0	2080074	8	Seropositive	273	3444	14337.2	324	9171	14729	241	2637	10609.2	214	1442	10913.9
DEN-204	0	2080150	3	Seropositive	2	4128	88.1998	2	5	48.7842	2	5	80.2625	2	5	53.022
DEN-204	0	2080196	2	Seropositive	5	73	1317.7	7	1095	1298.55	2	105	690.024	2	51	788.868
DEN-204	0	2080392	11	Seropositive	144	3243	4990.7	104	523	3491.95	123	720	3666.68	98	1033	3497.61
DEN-204	0	2080421	5	Seronegative	2	5	112.78	2	5	82.521	2	5	127.688	2	5	89.6066
DEN-204	0	2080447	13	Seropositive	4	17	323.353	3	38	281.15	4	50	273.764	8	419	587.21
DEN-204	0	2080478	8	Seropositive	18	252	2369.51	25	10919	2494.49	16	239	1312.43	10	250	1469.04
DEN-204	0	2080523	4	Seropositive	5	5	670.342	5	520	843.8	5	12	815.369	2	5	537.637
DEN-204	0	2110047	9	Seronegative	2	5	211.829	2	5	217.653	2	5	276.032	2	5	225.06
DEN-204	0	2110056	10	Seronegative	2	5	65.5042	2	5	36.3941	2	5	75.3466	2	5	54.0681
DEN-204	0	2110057	13	Seronegative	2	5	190.041	2	5	168.434	2	5	192.275	2	5	170.412
DEN-204	0	2110093	4	Seronegative	2	5	91.8815	2	5	89.2162	2	5	116.415	2	5	104.569
DEN-204	0	2110119	11	Seronegative	2	5	239.002	2	5	168.414	2	5	211.413	2	5	130.451
DEN-204	0	2110273	8	Seronegative	2	5	197.572	2	5	167.568	2	5	183.951	2	5	233.125
DEN-204	0	2110356	11	Seropositive	964	530	6015.11	828	1634	4972.73	666	1469	4990.4	579	1115	2635.54
